# Supplementary material for: Reversible transformation between CsPbBr3 nanowires and nanoparticles
Source: Royal Society of Chemistry journal article supplement (doi:10.1039/c9cc06123a), 2019-01-01
Supplement: c9cc06123a1.pdf [file c9cc06123a1.pdf]

## Supplementary Information

Yongqiang Ji<sup>a</sup>, Minqiang Wang\*<sup>a</sup>, Zhi Yang<sup>a</sup>, Shangdong Ji<sup>a</sup>, Hengwei Qiu<sup>a</sup>, Jinjuan Dou<sup>a</sup>,  
Nikolai V. Gaponenko<sup>b</sup>

<sup>a</sup>Electronic Materials Research Laboratory, Key Laboratory of the Ministry of Education International Center for Dielectric Research&Shanxi Engineering Research Center of Advanced Energy Materials and Devices, Xi'an Jiaotong University, Xi'an 710049, China.

<sup>b</sup>Belarusian State University of Informatics and Radioelectronics, P. Browki St.6, 220013 Minsk, Belarus.

## **Experimental details**

### **Materials and chemicals**

The cesium carbonate ( $\text{Cs}_2\text{CO}_3$ , 99.99%), oleic acid (OA, 85%), oleyamine (OLAM, 80-90%), Tri-n-octylphosphine (TOP, 90%), 1-octadecene (ODE, >90%), Tetrabutylammonium chloride (TBA-Cl, 95%) and Tetrabutylammonium iodide (TBA-I, 99%) were purchased from Aladdin. The lead(II) bromide ( $\text{PbBr}_2$ , 99.999%) was purchased from Xi'an Polymer Light Technology Corp, and the n-hexane and ethyl acetate purchased from Shanghai Chemical Industrial Company. All the reagents were used without further purification.

### **Synthesis of $\text{CsPbBr}_3$ NWs**

All syntheses were performed in air and without any pre-dried chemicals or solvents. In a typical synthesis,  $\text{PbBr}_2$  (1 mmol) was dissolved in 10 mL ODE, 0.5 mL TOP, 1 mL OA and 1 mL OLAM in a 30 mL vial on a hotplate set at 120 °C. After the  $\text{PbBr}_2$  was completely dissolved, 1 mL of Cs-OA (0.4 g  $\text{Cs}_2\text{CO}_3$  dissolved in 1.25 mL OA and 15 mL ODE in a 30 mL vial on a hotplate set to 100 °C) was swiftly injected, the reaction immediately turned pale yellow, depending on the required length and width, was quickly cooled down after 0-60 min to RT with a cold water bath.

### **Isolation and Purification**

First, equal volume ethyl acetate was added to the crude solution of nanowires (NWs). The solutions were first centrifuged at 5000 rpm for 5 min to remove excess by-products. Then, the supernatant was discarded and the aggregated QDs were redispersed in toluene.

### **Anion exchange of $\text{CsPbBr}_3$ NWs**

The anion exchange reaction was performed by using TBA-Cl and TBA-I as the anion

source. 1 g of TBA-Cl or 1 g of TBA-I was mixed with 5 ml OLA in a 100 ml three-neck flask, degassed under Ar flow at 10 min for 120 C and reacted at 200 C for 1 h. After reaction, the mixture was diluted by CHCl<sub>3</sub> with 1:3.

0.25 ml of crude CsPbBr<sub>3</sub> QDs were dispersed in 0.75 ml of CHCl<sub>3</sub>, and different amounts (Cl ranging from 50 to 400 μL, and I ranging from 50 to 400 μL) of anion resource solutions were quickly injected. The color of solution changed immediately, and extra 2 min was given to guarantee total ion exchange reaction. After reaction, the QDs were precipitated by adding ethyl acetate (1:1 v/v) and then centrifuged at 5000 rpm for 5 min. The obtained precipitate was re-dispersed in hexane for further characterization.

### **Measurement and characterization**

The transmission electron microscopy (TEM) studies were carried out using JEOL JEM-2100 at 200 kV. The photoluminescence (PL) spectra, quantum yields (QYs) and fluorescence lifetimes were recorded on an Edinburgh Instruments FLS9 spectrometer. The ultraviolet-visible (UV-Vis) absorption spectra were recorded by PE Lambda 950. The x-ray diffraction (XRD) patterns were obtained using the DB-ADVANCE X-ray diffraction analyzer diffractometer.

## Introduce and discuss some equations

There are four main equations corresponding to the reaction, Firstly, the Gibbs-Thomson equation, which can be written as

$$C_n = C_b \exp\left(\frac{2\sigma V_m}{rRT}\right) \quad (1)$$

In which  $C_n$  and  $C_b$  are the solubility of the nanoparticle and the corresponding bulk solid;  $\sigma$  is the specific surface energy;  $V_m$  is the molar volume of the material;  $R$  is the gas constant and  $T$  is the absolute temperature.

According to the Tauc method, For this purpose, a plot of  $(\alpha h\nu)^{1/2}$  versus  $h\nu$  was formed according to the following equation

$$\alpha(\nu)h\nu = B(h\nu - E_{\text{gap}})^m \quad (2)$$

where  $E_{\text{gap}}$ ,  $B$ , and  $h\nu$  are the optical gap, constant, and incident photon energy, respectively;  $\alpha(\nu)$  is the absorption coefficient,  $m$  is the index which can have different values of  $1/2$ ,  $3/2$ ,  $2$ , and  $3$ .

Equation is a tri-exponential fitting function:

$$I = A_1 \exp\left(-\frac{t}{\tau_1}\right) + A_2 \exp\left(-\frac{t}{\tau_2}\right) + A_3 \exp\left(-\frac{t}{\tau_3}\right) \quad (3)$$

Where  $A_1$ ,  $A_2$  and  $A_3$  are constants,  $t$  is time, and  $\tau_1$ ,  $\tau_2$ ,  $\tau_3$  represent the decay lifetimes.

The average lifetime ( $\tau_{\text{ave}}$ ) can be calculated as follows

$$\tau_{\text{ave}} = \frac{A_1 \tau_1^2 + A_2 \tau_2^2 + A_3 \tau_3^2}{A_1 \tau_1 + A_2 \tau_2 + A_3 \tau_3} \quad (4)$$

Table S1. Fitting parameters and average lifetimes for the produced CsPbBr<sub>3</sub> with morphology evolution from nanoparticles (NPs) to s-NWs, l-NWs and ul-NWs.

|       | $A_1(\%)$ | $\tau_1(\text{ns})$ | $A_2(\%)$ | $\tau_2(\text{ns})$ | $A_3(\%)$ | $\tau_3(\text{ns})$ | $\tau_{avg}(\text{ns})$ |
|-------|-----------|---------------------|-----------|---------------------|-----------|---------------------|-------------------------|
| 5 s   | 3.54      | 1.3885              | 28.37     | 7.6944              | 68.09     | 14.3217             | 11.9836                 |
| 10 s  | 3.15      | 1.3796              | 27.48     | 7.2771              | 69.37     | 16.1623             | 13.2549                 |
| 30 s  | 3.53      | 1.5534              | 22.90     | 7.2401              | 73.57     | 17.2832             | 14.4280                 |
| 60 s  | 3.75      | 1.7271              | 17.78     | 7.8954              | 78.47     | 17.8943             | 15.5102                 |
| 120 s | 4.17      | 1.6893              | 18.34     | 7.6942              | 77.49     | 18.5421             | 15.8494                 |
| 300 s | 4.54      | 1.7531              | 16.53     | 7.8953              | 78.93     | 19.6521             | 16.8960                 |

### Supplementary Figures:

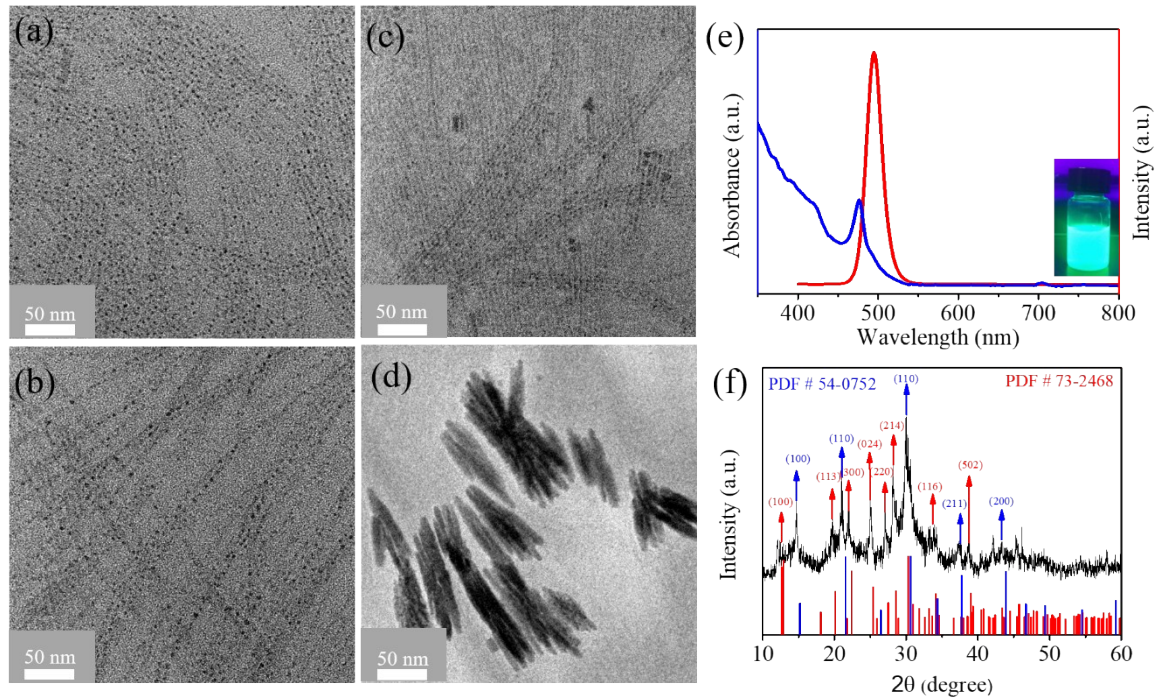

Figure 1. TEM images of CsPbBr<sub>3</sub> NWs: (a) Low concentration. (b) Medium concentration. (c) High concentration. (d) Excess concentration (e) UV-visible absorption (blue line) and photoluminescence (red line) spectra of CsPbBr<sub>3</sub> NWs. (Inset) Digital image of the solution illuminated with a 365 nm UV source. (f) The XRD pattern of CsPbBr<sub>3</sub> NWs.

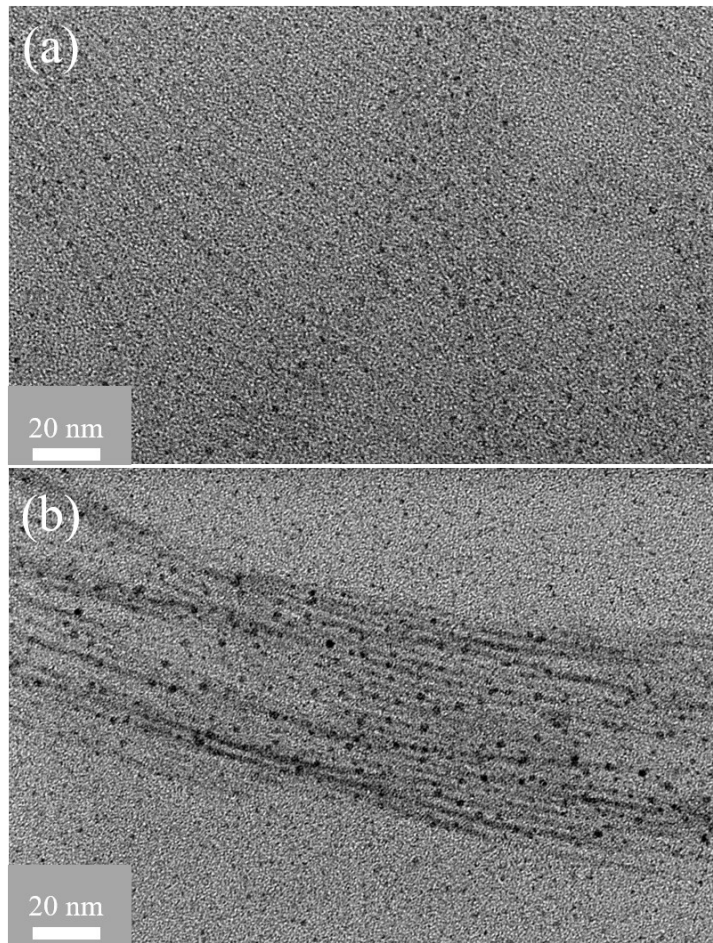

Figure 2. Enlarge TEM images of NWs: (a) Low concentration. (b) High concentration.

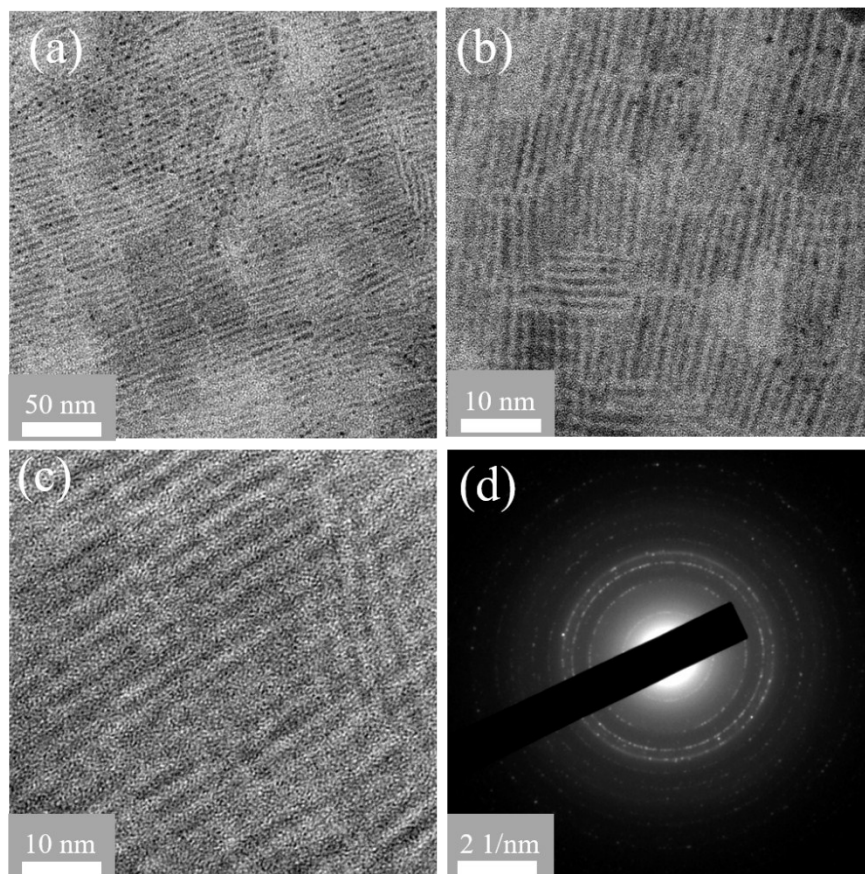

Figure 3. (a) TEM image of short NWs. (b) and (c) Enlarge images of NWs. (d) SAED image of short NWs.



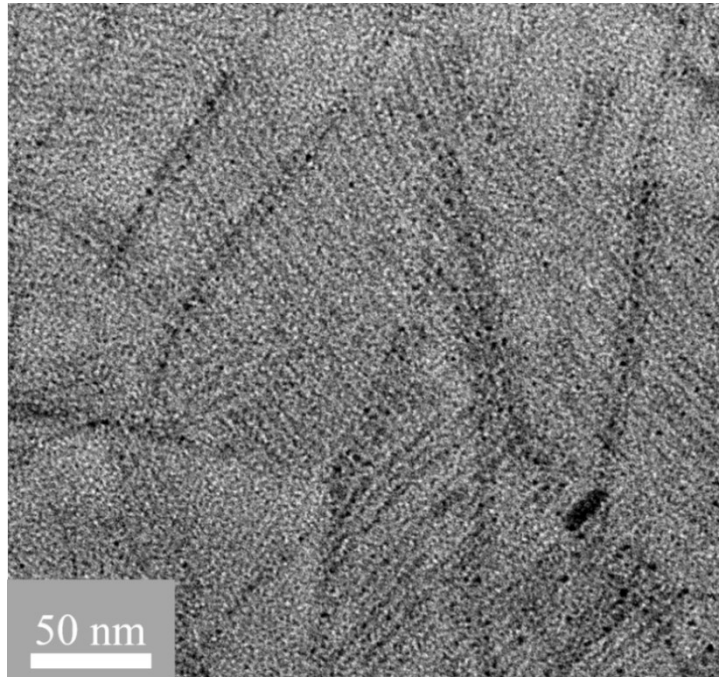

Figure 4. TEM image of comb-like nanostructures.

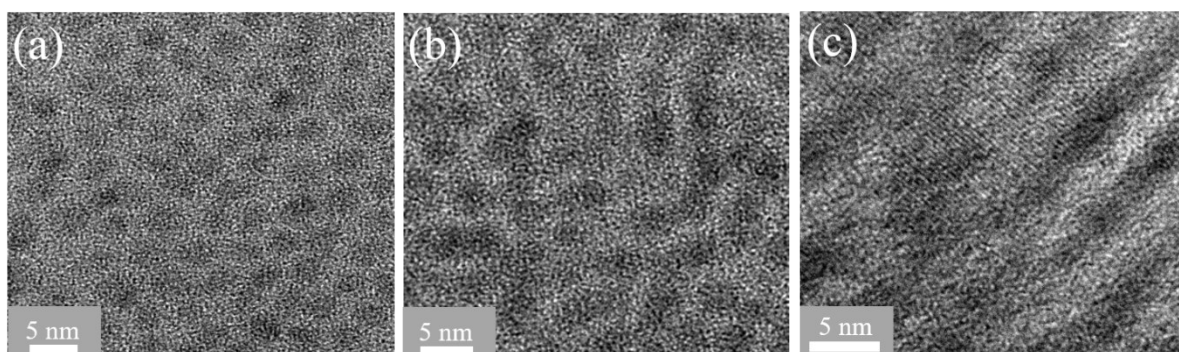

Figure 5. High-resolution TEM images showing three different stages of the NWs formation process from NPs to NWs. The length of the NWs changes but there is no significant change in the diameter.

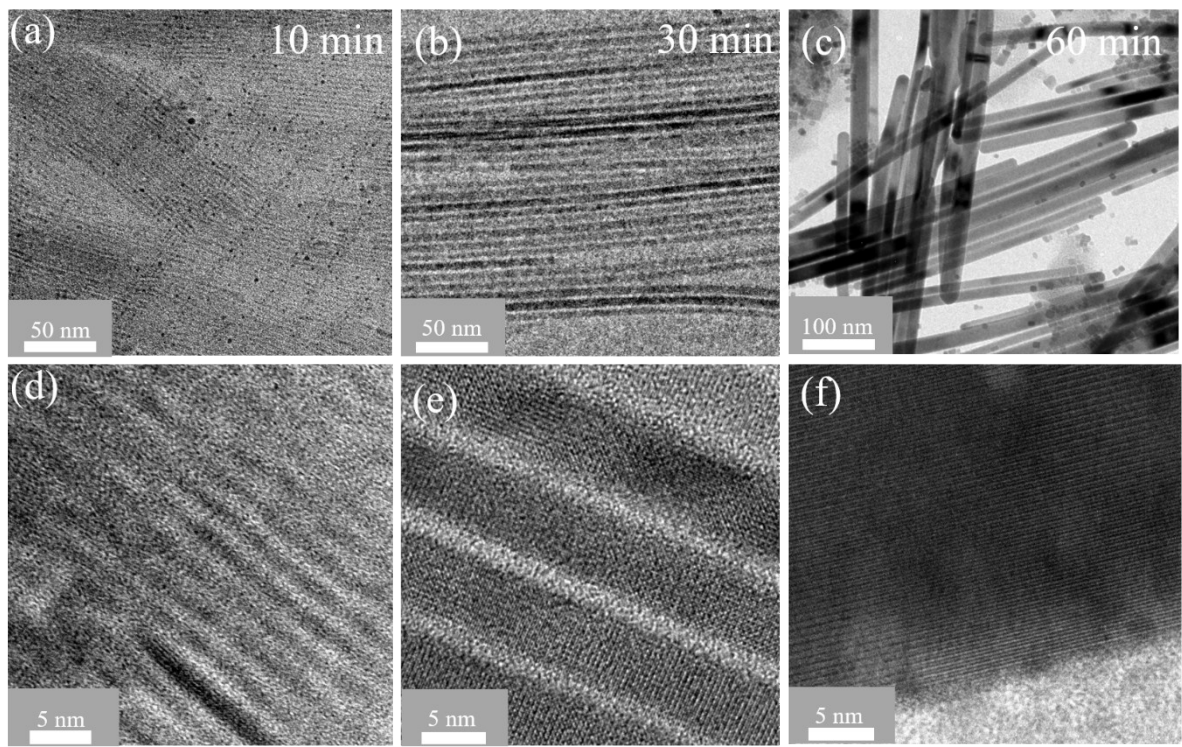

Figure 6. The TEM and high resolution TEM images of CsPbBr<sub>3</sub> NWs with different reaction time: (a, d) 10 min. (b, e) 30 min. (c, f) 60 min.

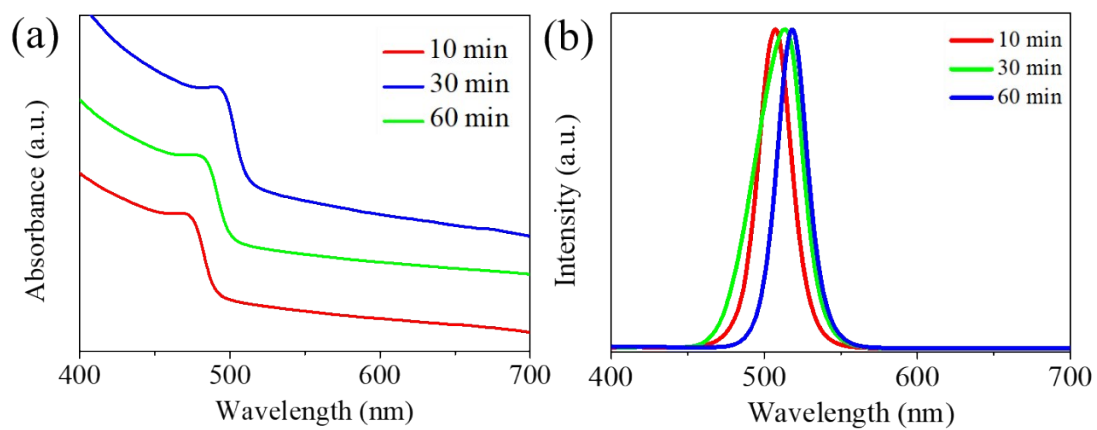

Figure 7. Normalized UV absorption and PL emission spectra of the CsPbBr<sub>3</sub> NWs with different reaction time.

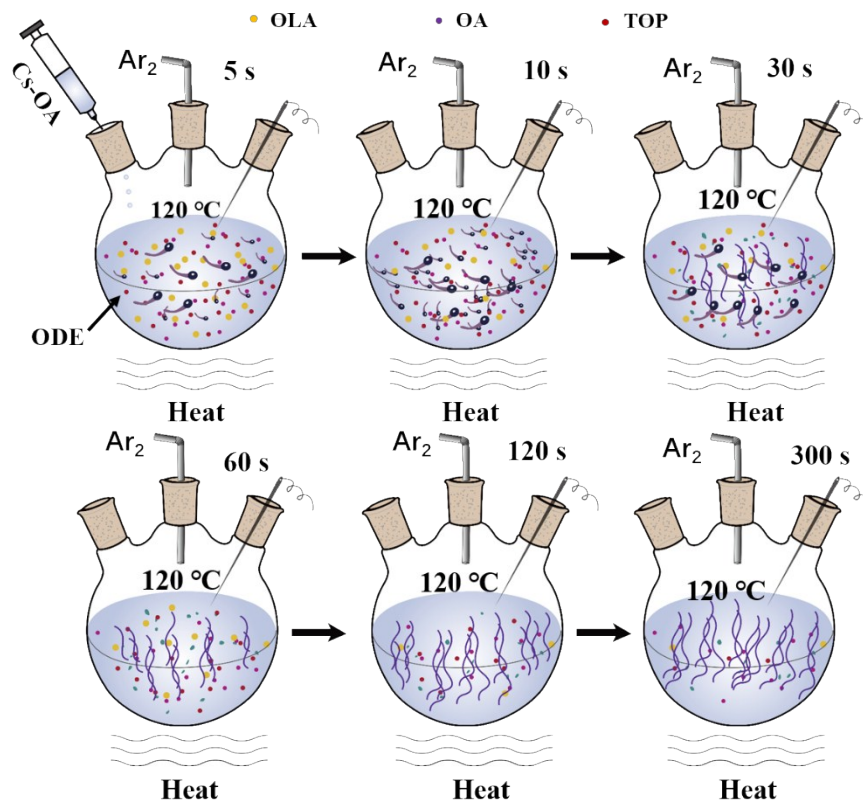

Figure 8. Schematic diagram of NPs self-assembly into NWs.

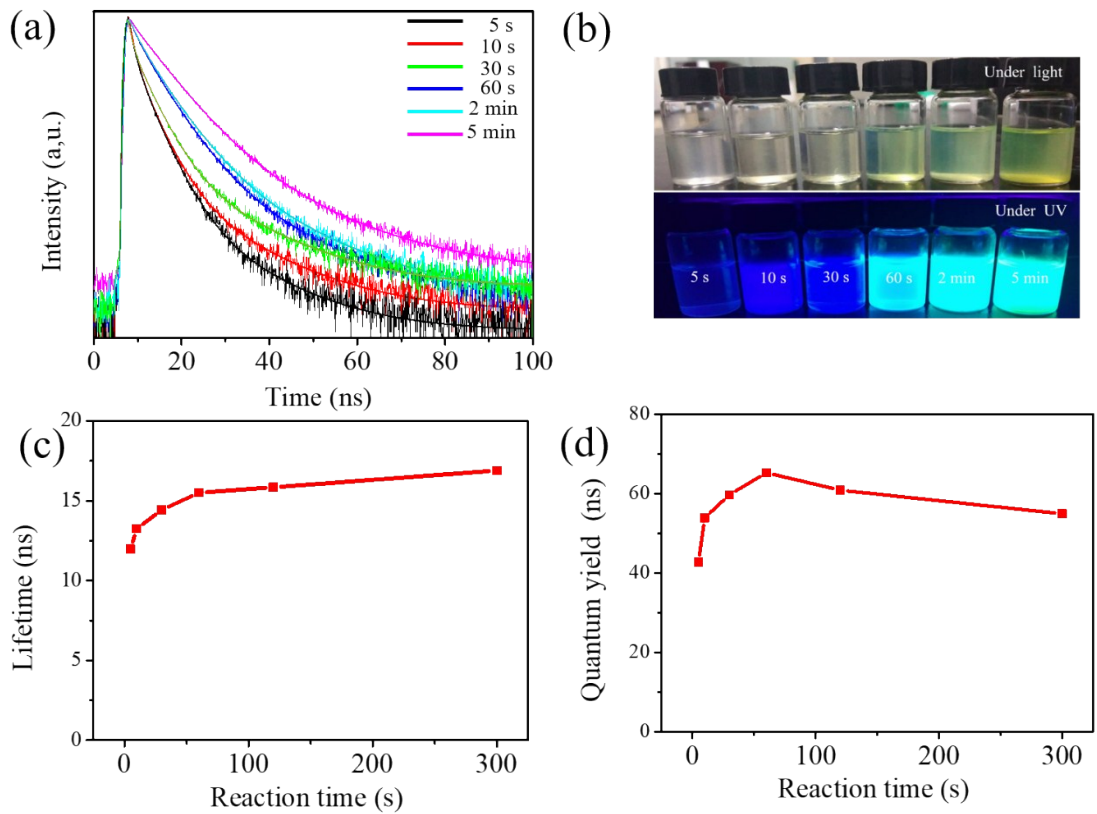

Figure 9. (a) and (c) average lifetime of the CsPbBr<sub>3</sub> NWs with different reaction time. (b) Digital image of the solution illuminated with daylight (Top) and a 365 nm UV source (Down), respectively. (d) PLQYs of the CsPbBr<sub>3</sub> NWs with different reaction time.

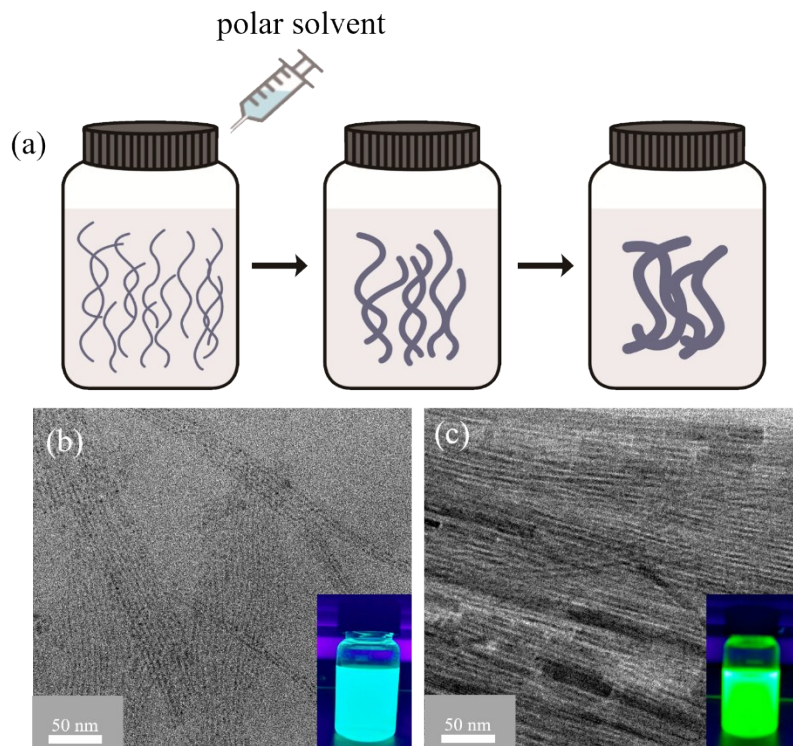

Figure 10. (a) Schematic diagram of ethanol-induced self-assembled NWs. (b) TEM images of initial NWs. (c) TEM images of ethanol-induced NWs. (Inset) Digital image of the solution illuminated with a 365 nm UV source.



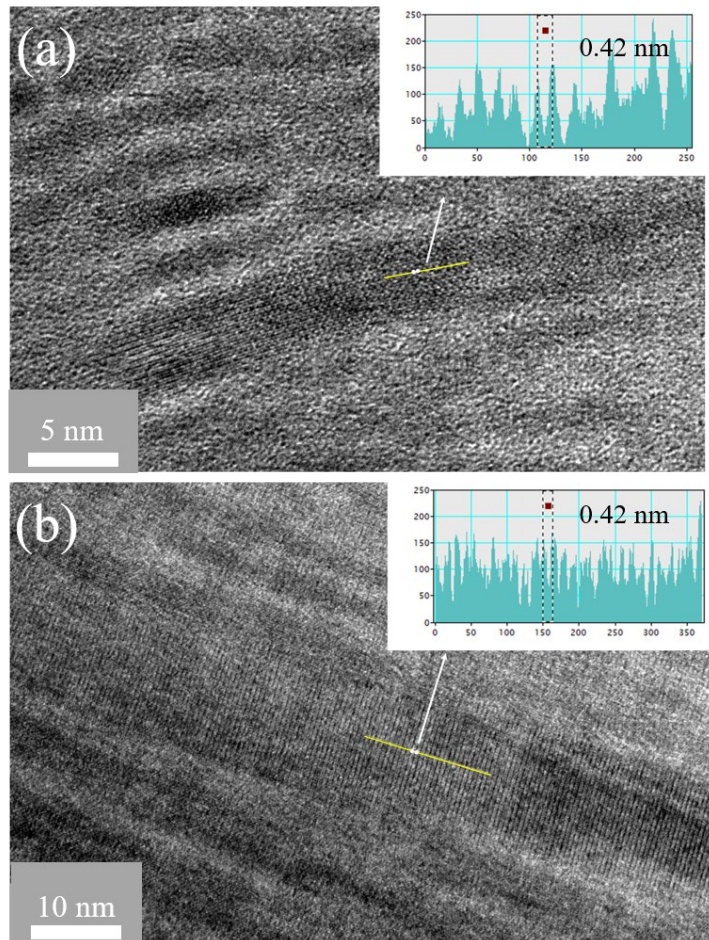

Figure 11. HRTEM images of ethanol-induced self-assembled NWs. (a) Before. (b) After. The lattice fringes exactly match with 110 lattice spacing of cubic phase CsPbBr<sub>3</sub>.



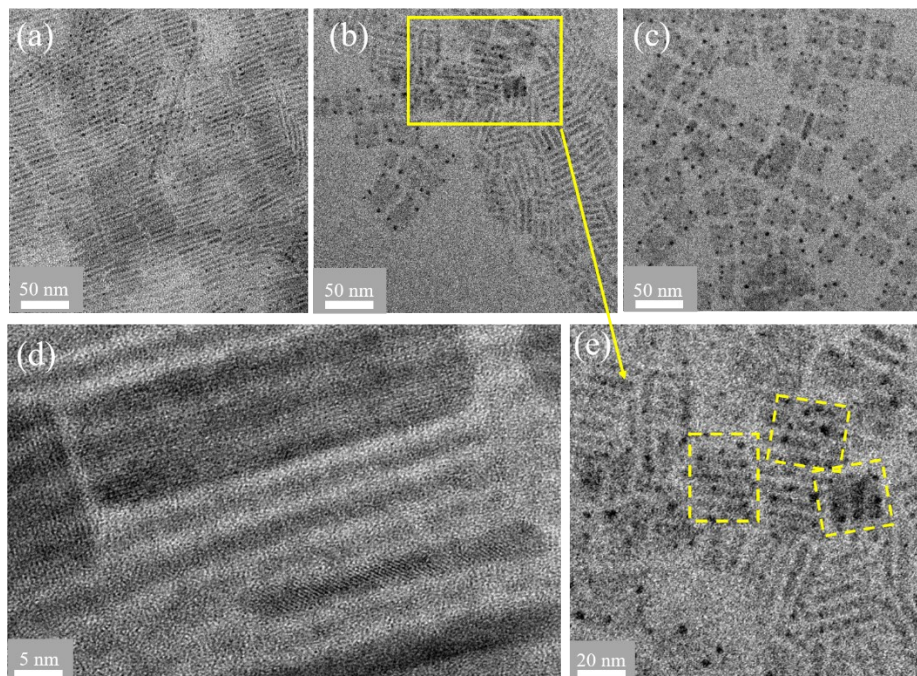

Figure 12. (a-c) Representative TEM images of samples showing transformation from s-NWs to nanosheets (NSs). (d) HRTEM images of NSs consisting of s-NWs. (e) Partially enlarged image of Figure b.

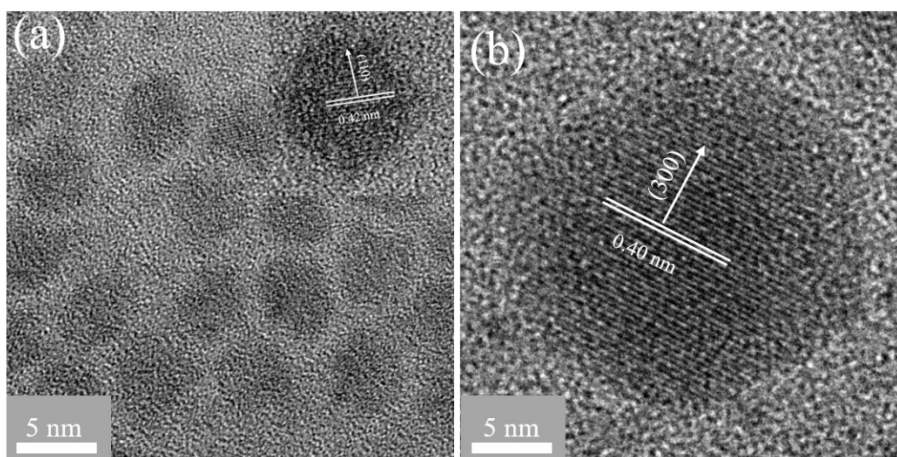

Figure 13. (a) HRTEM images of  $\text{CsPbBr}_3$  NPs. (b) HRTEM images of  $\text{Cs}_4\text{PbBr}_6$  NPs.

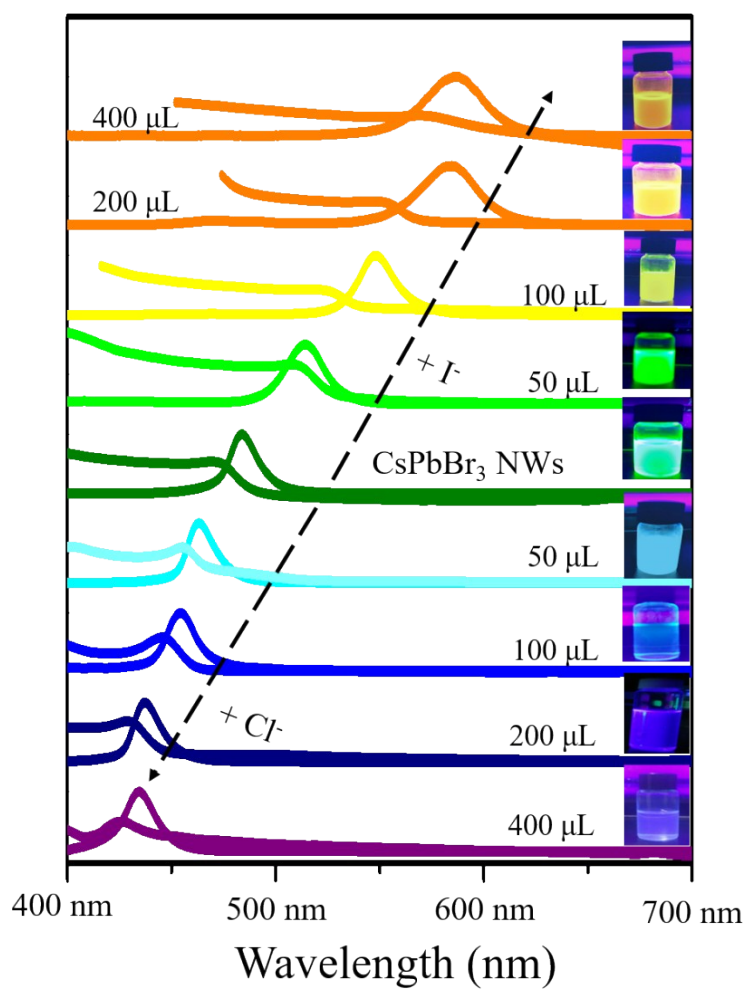

Figure 14. Normalized UV absorption and PL emission spectra of the CsPbBr<sub>3</sub> NWs after halide anion exchange with different halide compositions. (Inset) Digital image of the solution illuminated with a 365 nm UV source.
